# Supplementary material for: Attention Control and Audiomotor Processes Underlying Anticipation of Musical Themes while Listening to Familiar Sonata-Form Pieces
Source: MDPI journal article supplement (doi:10.3390/brainsci12020261), 2022-02-13
Supplement: s1 [file s1]

Supplementary Material

Attention control and audiomotor processes underlying anticipation of musical themes while listening to familiar sonata-form pieces

Table S1. Sonata-form stimuli.

| Key mode   | Composer                | Work                                                            | Performers                                                                                                                       | Intensity (root mean square) |                               | Brightness               |                               |
|------------|-------------------------|-----------------------------------------------------------------|----------------------------------------------------------------------------------------------------------------------------------|------------------------------|-------------------------------|--------------------------|-------------------------------|
|            |                         |                                                                 |                                                                                                                                  | Antecedent cues of theme     | Middle-final portion of theme | Antecedent cues of theme | Middle-final portion of theme |
| Major mode | Wolfgang Amadeus Mozart | Concerto for Flute, Harp, and Orchestra in C major, K. 299/297c | Academy of St. Martin-in-the-Fields conducted by Sir Neville Marriner. Soloists: Irena Grafenauer (flute) and Maria Graf (harp). | 0.203                        | 0.067                         | 0.261                    | 0.197                         |

|            |                             |                                                                   |                                                                                          |       |       |       |       |
|------------|-----------------------------|-------------------------------------------------------------------|------------------------------------------------------------------------------------------|-------|-------|-------|-------|
|            | Felix Mendelssohn-Bartholdy | Symphony No. 4 (' <i>Italian</i> ') in A major, Op. 90            | London Symphony Orchestra conducted by Claudio Abbado.                                   | 0.192 | 0.097 | 0.352 | 0.441 |
|            | Ludwig van Beethoven        | Symphony No. 7 in A major, Op. 92                                 | Cleveland Orchestra conducted by George Szell.                                           | 0.116 | 0.150 | 0.369 | 0.304 |
|            | Ludwig van Beethoven        | Piano Concerto No. 5 (' <i>Emperor</i> ') in E-flat major, Op. 73 | Berliner Philharmoniker conducted by Ferdinand Leitner. Soloist: Wilhelm Kempff (piano). | 0.197 | 0.231 | 0.361 | 0.295 |
| Minor mode | Franz Joseph Haydn          | Symphony No. 45 (' <i>Farewell</i> ') in F-sharp minor, Hob. I:45 | Orchestra of St. Luke's conducted by Sir Charles Mackerras.                              | 0.019 | 0.103 | 0.483 | 0.357 |
|            | Wolfgang Amadeus Mozart     | Symphony No. 25 in G minor, K. 183/173dB                          | Wiener Philharmoniker conducted by Leonard Bernstein.                                    | 0.070 | 0.159 | 0.214 | 0.521 |
|            | Ludwig van Beethoven        | Symphony No. 5 (' <i>Fate</i> ') in C minor, Op. 67               | Wiener Philharmoniker conducted by Carlos Kleiber.                                       | 0.120 | 0.027 | 0.425 | 0.260 |

|  |                    |                                            |                                                                                                  |       |       |       |       |
|--|--------------------|--------------------------------------------|--------------------------------------------------------------------------------------------------|-------|-------|-------|-------|
|  | Johannes<br>Brahms | Piano Concerto No. 1<br>in D minor, Op. 15 | Berliner Philharmoniker conducted by Sir<br>Simon Rattle. Soloist: Krystian Zimerman<br>(piano). | 0.166 | 0.088 | 0.362 | 0.189 |
|--|--------------------|--------------------------------------------|--------------------------------------------------------------------------------------------------|-------|-------|-------|-------|
